# Supplementary material
Source: publisher site journal article supplement (https://www.dovepress.com/article/366335)
Supplement: Supplementary file 1 [file get_supplementary_file.php]

## Supplementary Figures

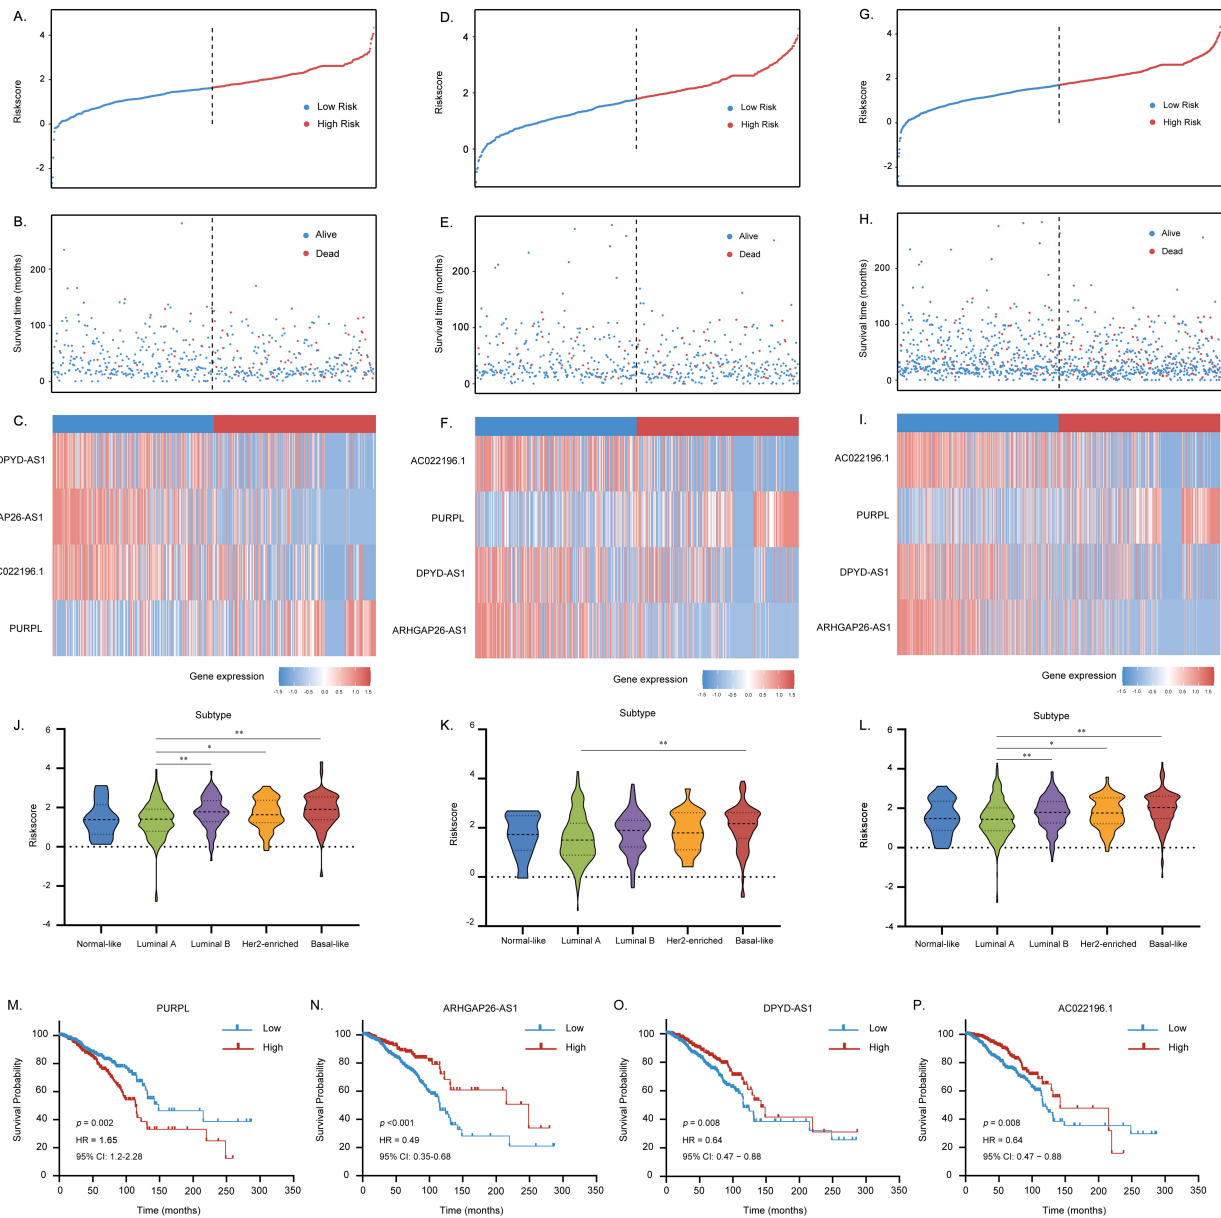

**Supplementary Figure 1.** Validation of the IRLP in TCGA cohort. (A) Distribution of risk score in TCGA training cohort. (B) Survival status of breast cancer patients in TCGA training cohort. (C) Heatmap of the lncRNAs expression profiles of the lncRNAs in TCGA training cohort. (D) Distribution of risk score in TCGA internal validation cohort. (E) Survival status of breast cancer patients in TCGA internal validation cohort. (F) Heatmap of the lncRNAs expression profiles of the lncRNAs in TCGA internal validation cohort. (G) Distribution of risk score in the entire TCGA cohort. (H) Survival status of breast cancer patients in the entire TCGA cohort. (I) Heatmap of the lncRNAs expression profiles of the lncRNAs in the entire TCGA cohort. (J-L) The correlation between risk score and different breast cancer subtypes in TCGA training cohort (J), TCGA internal validation cohort (K) and the entire TCGA cohort (L). (M-P) Four immune-related prognostic lncRNAs associated with OS in breast cancer patients using Kaplan–Meier curves and log-rank tests in the entire TCGA cohort. \* $p < 0.05$ ; \*\* $p < 0.01$ .

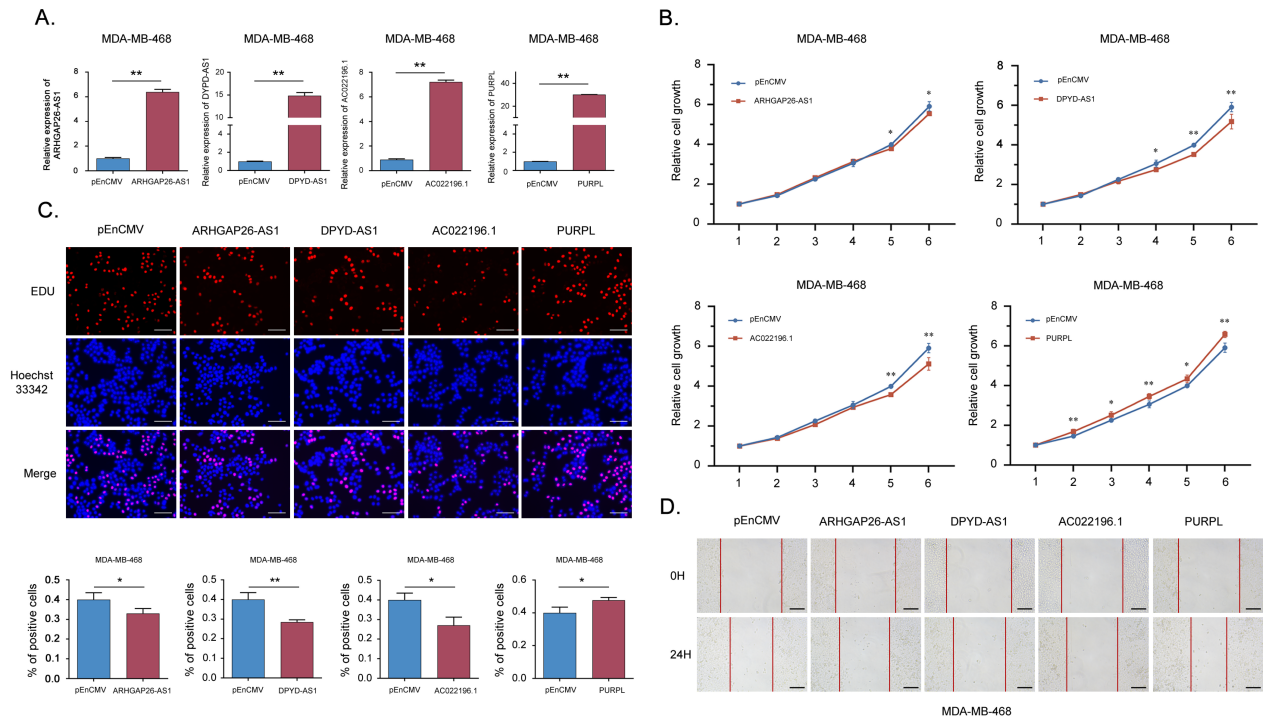

**Supplementary Figure 2.** Gain-of-function assay of selected immune-related lncRNAs in MDA-MB-468 cells. (A) The overexpression efficiencies of selected lncRNAs. (B) Effects of selected lncRNAs on cell proliferation were evaluated using the MTT assay. (C) Effects of selected lncRNAs on cell proliferation were tested using the EdU assay. Scale bars: 100  $\mu\text{m}$ . (D) Effects of selected lncRNAs on cell migration were verified by performing a scratch assay. Scale bars: 200  $\mu\text{m}$ . \* $p < 0.05$ ; \*\* $p < 0.01$ .

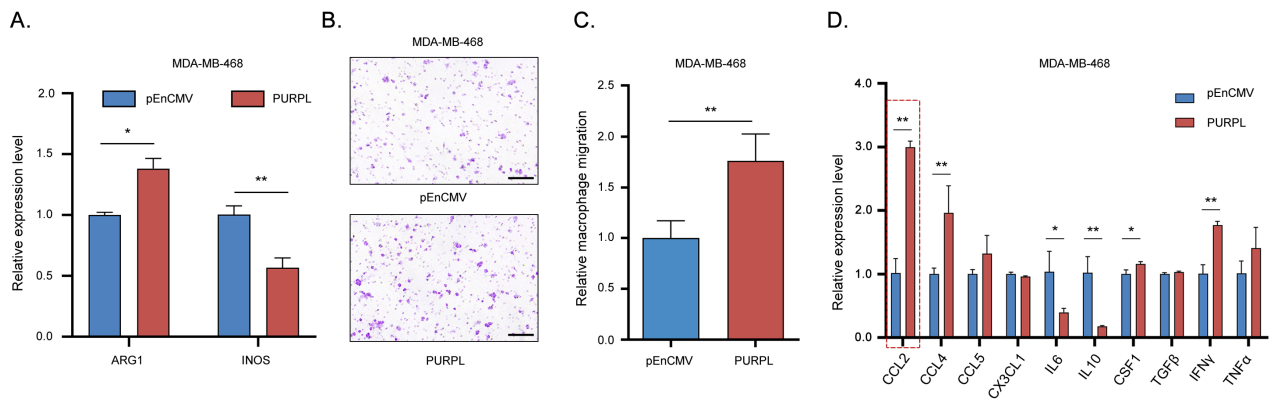

**Supplementary Figure 3.** PURPL upregulation in MDA-MB-468 promotes the recruitment and M2 polarization of macrophages. (A) qRT-PCR detection of ARG1 and iNOS in macrophages cocultured with MDA-MB-468 cells. (B-C) PURPL-overexpressing MDA-MB-468 cells promoted the migration of macrophages. Five random fields per chamber were observed to count cells at a magnification of 100 $\times$ . Each assay was performed in triplicate. Scale bars: 200  $\mu\text{m}$ . (D) A group of cytokines related to macrophage recruitment and polarization as evaluated using qRT-PCR after coculture with PURPL-overexpressing MDA-MB-468 cells. \* $p < 0.05$ ; \*\* $p < 0.01$ .

## Supplementary Tables

**Supplementary Table 1.** Primer sets used for qRT-PCR

| Primer set    | Primers | Sequence (5'-3')         |
|---------------|---------|--------------------------|
| AC022196.1    | Forward | ACAACATCTGTTTCCTGCTGGG   |
|               | Reverse | TTCTGCCTCTCTCAATGCTTCC   |
| ARHGAP26-AS1  | Forward | CAAAGCCCAACACTCTACTGCTT  |
|               | Reverse | GTTGGGAGGTTACCTCTGATG    |
| DPYD-AS1      | Forward | AATCCCTGCTTCCTGTCTGCT    |
|               | Reverse | CTGGGTTAGGCAAGCTGTTCA    |
| PURPL         | Forward | CGTGTGAAAAGAACCCAGGTA    |
|               | Reverse | CGCCTGGTAAAACAACCAAGT    |
| CCL4          | Forward | CTGTGCTGATCCCAGTGAATC    |
|               | Reverse | TCAGTTCAGTTCAGGTCATACA   |
| CX3CL1        | Forward | ACCACGGTGTGACGAAATG      |
|               | Reverse | TGTTGATAGTGGATGAGCAAAGC  |
| IL6           | Forward | ACTCACCTCTTCAGAACGAATTG  |
|               | Reverse | CCATCTTTGGAAGGTTTCAGGTTG |
| IL10          | Forward | GACTTTAAGGGTTACCTGGGTTG  |
|               | Reverse | TCACATGCGCCTTGATGTCTG    |
| IFN- $\gamma$ | Forward | TCGGTAACTGACTTGAATGTCCA  |
|               | Reverse | TCGCTTCCCTGTTTTAGCTGC    |

|                |         |                          |
|----------------|---------|--------------------------|
| TNF- $\alpha$  | Forward | CCTCTCTCTAATCAGCCCTCTG   |
|                | Reverse | GAGGACCTGGGAGTAGATGAG    |
| iNOS           | Forward | AGCATGAGCCCCTTCATCAAT    |
|                | Reverse | CTGTTTCAACGACCTCCGGG     |
| ARG1           | Forward | TGGACAGACTAGGAATTGGCA    |
|                | Reverse | CCAGTCCGTCAACATCAAAACT   |
| $\beta$ -Actin | Forward | CATGTACGTTGCTATCCAGGC    |
|                | Reverse | CTCCTTAATGTCACGCACGAT    |
| CCL2           | Forward | TCATAGCAGCCACCTTCATTC    |
|                | Reverse | CATGGAATCCTGAACCCACTT    |
| CCL5           | Forward | GCAAGCTTTGTCACCCGAAA     |
|                | Reverse | AAGTTCAGGTTCAAGGACTCTCCA |
| TGF- $\beta$   | Forward | CTAATGGTGGAAACCCACAACG   |
|                | Reverse | TATCGCCAGGAATTGTTGCTG    |
| CSF-1          | Forward | AGACCTCGTGCCAAATTACATT   |
|                | Reverse | AGGTGTCTCATAGAAAGTTCGGA  |

---
